# Supplementary material for: Holocene biome changes in Asia – an analysis of different transient Earth system model simulations
Source: Copernicus journal article supplement (doi:10.5194/cp-2016-67), 2016-07-07
Supplement: Supplementary file 1 [file cp-2016-67-supplement.pdf]

| no. | biome                              | dominant pft                | subpft                                                          | additional environmental limits          |
|-----|------------------------------------|-----------------------------|-----------------------------------------------------------------|------------------------------------------|
| 1   | Tropical evergreen forest          | tropical evergreen trees    | -                                                               | -                                        |
|     |                                    | tropical deciduous trees    | -                                                               | number of green days > 300               |
| 2   | Tropical semi-deciduous forest     | tropical deciduous trees    | -                                                               | number of green days between 250 and 300 |
| 3   | Tropical deciduous forest/woodland | tropical deciduous trees    | -                                                               | number of green days < 250               |
| 4   | Temperate deciduous forest         | temperate deciduous trees   | No temp. broadleaved or boreal evergreen tree present           | -                                        |
|     |                                    | temperate deciduous trees   | Boreal evergreen trees present                                  | Twm > 21                                 |
|     |                                    | boreal evergreen trees      | temp. deciduous trees present                                   | GDD5 > 900 and Tcm > -19, Twm > 21       |
|     |                                    | Boreal deciduous trees      | Temp. deciduous trees                                           |                                          |
| 5   | Temperate conifer forest           | cool conifer                | No temp broadl. trees present, no boreal dec. trees subdominant | -                                        |
|     |                                    | cool conifer                | temperate deciduous trees with nearly similar npp               | -                                        |
| 6   | Warm mixed forest                  | temperate broadleaved trees |                                                                 | -                                        |
|     |                                    | Temperate deciduous trees   | No boreal trees, but temp. broadleaved trees present            |                                          |
|     |                                    | temperate deciduous trees   | No boreal trees, but cool conifer present                       | Tcm > 3 and GDD5 > 3000                  |
|     |                                    | cool conifer                | temp. broadleav. trees present                                  | -                                        |
| 7   | Cool mixed forest                  | temperate deciduous trees   | boreal evergreen trees present                                  | Twm < 21 and Tcm > -15                   |
|     |                                    | boreal evergreen trees      | temp. deciduous trees present                                   | GDD5 > 900 and Tcm > -19, Twm < 21       |
| 8   | Cool conifer forest                | boreal evergreen trees      | no temp. dec. trees present                                     | GDD5 > 900 and Tcm > -19                 |
| 9   | Cold mixed forest                  | temperate deciduous trees   | boreal evergreen trees present                                  | Twm < 21 and Tcm < -15                   |
|     |                                    | cool conifer                | boreal deciduous trees                                          | -                                        |
|     |                                    | boreal evergreen trees      | temp. deciduous trees present                                   | GDD5 < 900 and Tcm < -19                 |
|     |                                    | boreal deciduous trees      | cool conifer                                                    | -                                        |
| 10  | Evergreen taiga/montane forest     | boreal evergreen trees      | no temp dec trees present                                       | GDD5 < 900 and Tcm < -19 and npp > 350   |

|    |                                 |                                 |                                |                                        |
|----|---------------------------------|---------------------------------|--------------------------------|----------------------------------------|
|    |                                 | boreal deciduous trees          | boreal evergreen trees         | -                                      |
| 11 | Deciduous taiga/montane forest  | boreal deciduous trees          | no temp dec. or cool conifers  | GDD5 < 900 and Tcm < -19               |
| 12 | Tropical savanna                | shrubs                          | tropical trees present         | woody LAI > 3.5                        |
| 13 | Temperate broadleaved savanna   | shrubs                          | temp. deciduous. trees present |                                        |
| 14 | Temperate sclerophyll woodland  | shrubs                          | temp.broadleav. trees present  | -                                      |
| 15 | Temperate xerophytic shrubland  | woody desert                    | -                              | grass LAI > 1.2 and Tmin < 0           |
| 16 | Tropical xerophytic shrubland   | woody desert                    | -                              | grass LAI > 1.2 and Tmin > 0           |
|    |                                 | shrubs                          | tropical trees present         | woody LAI < 3.5                        |
| 17 | Open conifer woodland           | shrubs                          | cool conifer present           | -                                      |
| 18 | Boreal parkland                 | boreal evergreen trees          | -                              | GDD5 < 900 and Tcm < -19 and npp < 350 |
|    |                                 | shrubs                          | boreal trees present           | Twm < 21                               |
|    |                                 | Boreal deciduous trees          | -                              | NPP < 250                              |
| 19 | Tropical grassland              | C4 tropical grass               | -                              | -                                      |
| 20 | Temperate grassland             | C3/C4 temperate grass           | -                              | GDD0 > 800                             |
| 21 | Desert                          | woody desert                    | -                              | grass LAI < 1.2                        |
|    |                                 | temp. or trop. Trees or conifer | -                              | NPP < 100                              |
|    |                                 | C3/C4 temperate grass           | no boreal trees possible       | -                                      |
| 22 | Steppe tundra                   | C3/C4 temperate grass           | -                              | GDD0 < 800                             |
|    |                                 | cold herbaceous                 | -                              | -                                      |
| 23 | Shrub tundra                    | tundra shrub                    | -                              | GDD0 > 650                             |
| 24 | Dwarf shrub tundra              | tundra shrub                    | -                              | 400 < GDD0 < 650                       |
| 25 | Prostrate shrub tundra          | tundra shrub                    | -                              | GDD0 < 400                             |
| 26 | Cushion forb lichen moss tundra | lichen / forb                   | -                              | -                                      |
| 27 | Barren                          | no pft possible                 | -                              | -                                      |
| 28 | Land ice                        | all                             | all                            | Twm < 2                                |
